# Supplementary material for: Allium-Derived Compound Propyl Propane Thiosulfonate (PTSO) Reduces Vibrio Populations and Increases Body Weight of European Seabass (Dicentrarchus labrax) Juveniles
Source: MDPI journal article supplement (doi:10.3390/antibiotics12010134), 2023-01-10
Supplement: s1 [file s1]

## Supplementary Materials

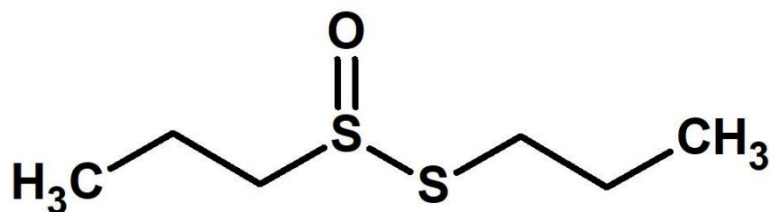

PTS

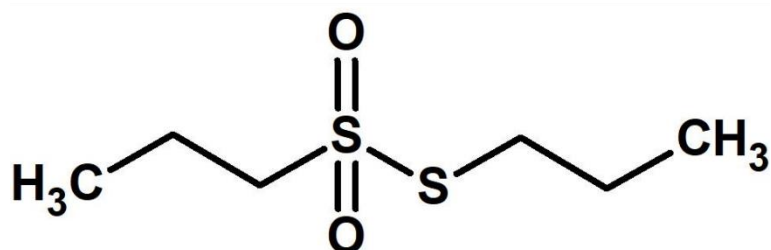

PTSO

Figure S1. Structure of PTS and PTSO.

Table S1. Diet composition of the fish experimental diet.

| Nutrient composition      |       |
|---------------------------|-------|
| Crude protein %           | 45.00 |
| Crude Fat %               | 20.00 |
| Cellulose %               | 2,8   |
| Ash %                     | 8.00  |
| N.F.E. %                  | 13,3  |
| Moisture %                | 10.00 |
| Calcium %                 | 1,8   |
| Phosphorus %              | 0,9   |
| Gross Energy (MJ/Kg)      | 21,10 |
| Digestible Energy (MJ/Kg) | 17,5  |
| Protein Digestibility %   | 90.00 |
| PD/DE (gr/MJ)             | 23,14 |
| PTSO (mg/Kg)              | 150   |
